# Supplementary material for: N-acetylcysteine for non-paracetamol drug-induced liver injury: a systematic review protocol
Source: PubMed Central journal article supplement (PMC4470061; doi:10.1186/s13643-015-0075-6), 2015-06-12
Supplement: 13643_2015_75_MOESM1_ESM.pdf [file 13643_2015_75_MOESM1_ESM.pdf]

**Additional file 1: Electronic search strategy**

| Search | Query                                                                                                                                                                                                                                                                    |
|--------|--------------------------------------------------------------------------------------------------------------------------------------------------------------------------------------------------------------------------------------------------------------------------|
| #5     | Search (#3 AND #4)                                                                                                                                                                                                                                                       |
| #4     | Search (acetylcysteine[mh] OR acetylcysteine[tiab] OR n-acetylcysteine[tiab] OR n-acetyl-L-cysteine[tiab] OR n-acetylcystine[tiab] OR acetyl cysteine[tiab] OR n-acetyl cysteine[tiab])                                                                                  |
| #3     | Search (#1 OR #2)                                                                                                                                                                                                                                                        |
| #2     | Search (liver failure[mh] OR liver failure[tiab] OR hepatic failure[tiab] OR hepatic injur*[tiab])                                                                                                                                                                       |
| #1     | Search (chemically-induced liver failure OR drug-induced liver injury[mh] OR drug induced liver injur*[tiab] OR drug induced liver disease*[tiab] OR drug induced hepatitides[tiab] OR drug induced hepatitis[tiab] OR toxic hepatitides[tiab] OR toxic hepatitis[tiab]) |
