# Supplementary material for: N-acetylcysteine for non-paracetamol drug-induced liver injury: a systematic review protocol
Source: PubMed Central journal article supplement (PMC4470061; doi:10.1186/s13643-015-0075-6), 2015-06-12
Supplement: 13643_2015_75_MOESM2_ESM.pdf [file 13643_2015_75_MOESM2_ESM.pdf]

**Additional file 2:** Adapted version of a modified Newcastle-Ottawa Scale for single use in specific context

**Modified Newcastle-Ottawa Scale (NOS)**

Legend

|                                       |
|---------------------------------------|
| 0 = Definitely no (high risk of bias) |
| 1 = Mostly no                         |
| 2 = Mostly yes                        |
| 3 = Definitely yes (low risk of bias) |

**Domain of evaluation:** Methods for selecting study participants (*i.e. Selection bias*)

**Is the source population (cases, controls, cohorts) appropriate and representative of the population of interest?**

0 (high risk of bias)                      1                      2                      3 (low risk of bias)

Example of low risk of bias: A consecutive sample or random selection from a population that is representative of the condition under study.

Example of moderate risk of bias: A consecutive sample or random selection from a population that is not highly representative of the condition under study.

Example of high risk of bias: The source population cannot be defined or enumerated (*i.e.* volunteering or self-recruitment).

**Domain of evaluation:** Methods to control confounding (*i.e. Performance bias*)

**Is the sample size adequate and is there sufficient power to detect a meaningful difference in the outcome of interest?**

0 (high risk of bias)                      1                      2                      3 (low risk of bias)

Example of low risk of bias: Sample size was adequate and there was sufficient power to detect a difference in the outcome.

Example of high risk of bias: Sample size was small and there was not enough power to test outcome of interest.

**Did the study identify and adjust for any variables or confounders that may influence the outcome?**

0                      1                      2                      3

(high risk of bias)

(low risk of bias)

Example of low risk of bias: The study identified and adjusted for all possible confounders that may influence estimates of association between exposure and outcome (*i.e. Was the patient being treated for a medical condition such as chronic pain and was being prescribed opioids while on methadone treatment?*)

Example of moderate risk of bias: The study identified and reported possible variables that may influence the outcome but did not explore the interaction.

Example of high risk of bias: The study either did not report any variables of influence or acknowledge variables of influence when it was clear they were present.

**Domain of evaluation:** Statistical methods (*i.e. Detection bias*)

**Did the study use appropriate statistical analysis methods relative to the outcome of interest?**

0

1

2

3

(high risk of bias)

(low risk of bias)

Example of low risk of bias: The study reported use of appropriate statistical analysis as required (*i.e. adjusting for an unbalanced distribution of a specific covariate among sexes, or correcting for multiple testing error*)

Example of moderate risk of bias: The study either used correct statistical methods but did not report them well, or used the incorrect methods but reported them in detail.

Example of high risk of bias: The study did not use appropriate statistical analysis as required (*i.e. did not adjust for an unbalanced distribution of a specific covariate among sexes, or correct for multiple testing error when necessary*) or did not report them adequately.

**Is there little missing data and did the study handle it accordingly?**

0

1

2

3

(high risk of bias)

(low risk of bias)

Example of low risk of bias: The study acknowledged missing data to be less than 10% and specified the method of handling it.

Example of moderate risk of bias: The study either had greater than 15% but they specified the method they used to handle it.

Example of high risk of bias: The study had greater than 15% missing data and did not handle it at all.

**Domain of evaluation:** Methods for measuring outcome variables (*i.e. Information bias*)

**Is the methodology of the outcome measurement explicitly stated and is it appropriate?**

0  
(high risk of bias)

1

2

3  
(low risk of bias)

Example of low risk of bias: The study provides a detailed description of the outcome measure(s) which are appropriate for the outcome of interest.

Example of moderate risk of bias: The study provides a somewhat complete description of outcome measurements and they are justified.

Example of high risk of bias: The study provides limited information on the methods of measuring the outcome and the measure is not appropriate considering the outcome.

**Is there an objective assessment of the outcome of interest?**

0  
(high risk of bias)

1

2

3  
(low risk of bias)

Example of low risk of bias: The study used objective methods to discern the outcome status of participants (*i.e. laboratory measurements, medical records*).

Example of moderate risk of bias: The study relied on subjective data as the primary method to discern outcome status of participants (*i.e. self-report*).

Example of high risk of bias: The study had limited reporting about assessment of outcomes.
